1 ***p53* deletion rescues lethal microcephaly in a mouse model with neural stem cell**  
2 **abscission defects**

3

4

5

6 Jessica Neville Little<sup>1</sup> and Noelle D. Dwyer<sup>1,2</sup>

7

8 <sup>1</sup> Department of Cell Biology, University of Virginia School of Medicine, Charlottesville, VA, USA

9

10 <sup>2</sup> Corresponding author. Email: [ndwyer@virginia.edu](mailto:ndwyer@virginia.edu)

11

12

13

14

15 **ABSTRACT**

16

17 Building a cerebral cortex of the proper size involves balancing rates and timing of neural stem  
18 cell (NSC) proliferation, neurogenesis, and cell death. The cellular mechanisms connecting  
19 genetic mutations to brain malformation phenotypes are still poorly understood. Microcephaly  
20 may result when NSC divisions are too slow, produce neurons too early, or undergo apoptosis,  
21 but the relative contributions of these cellular mechanisms to various types of microcephaly are  
22 not understood. We previously showed that mouse mutants in *Kif20b* (formerly called  
23 *Mphosph1*, *Mpp1*, or *KRMP1*) have small cortices that show elevated apoptosis, and defects in  
24 maturation of NSC midbodies, which mediate cytokinetic abscission. Here we test the  
25 contribution of intrinsic NSC apoptosis to brain size reduction in this lethal microcephaly model.  
26 By making double mutants with the pro-apoptotic genes *Bax* and *Trp53* (*p53*), we find that  
27 apoptosis of cortical NSCs accounts for most of the microcephaly, but that there is a significant  
28 apoptosis-independent contribution as well. Remarkably, heterozygous *p53* deletion is sufficient  
29 to fully rescue survival of the *Kif20b* mutant into adulthood. In addition, the NSC midbody  
30 maturation defects are not rescued by *p53* deletion, showing that they are either upstream of  
31 *p53* activation, or in a parallel pathway. Thus, this work potentially identifies a novel midbody-  
32 mediated pathway for *p53* activation, and elucidates both NSC apoptosis and abscission  
33 mechanisms that could underlie human microcephaly or other brain malformations.

34

35

36

37

38

39

40

## 41 INTRODUCTION

42

43 Human genetics is increasingly successful at linking specific gene mutations to  
44 congenital brain malformations and other neurodevelopmental disorders. However, the cellular  
45 mechanisms connecting genetic mutations to brain phenotypes are still poorly understood.  
46 There are 17 human primary microcephaly genes identified, and there are many syndromes that  
47 feature microcephaly (Duerinckx and Abramowicz, 2018; Online Mendelian Inheritance in Man  
48 (OMIM) database). Thus it is a heterogeneous disorder. Known microcephaly genes encode  
49 proteins with diverse molecular functions, but many are involved in cell division.

50 Cell division genes may be prominent in brain malformations like microcephaly because  
51 cortical neural stem cells (NSC) divisions have several unusual features (Dwyer et al., 2016).  
52 NSCs are tall, thin cells that reside in the pseudostratified epithelium of the cortex, with their  
53 apical endfeet forming the ventricular surface, and their basal processes stretching to the basal  
54 lamina beneath the meninges. Their nuclei undergo interkinetic nuclear migration during the cell  
55 cycle, moving basally for S-phase and to the apical membrane for M-phase and cytokinesis. In  
56 addition, NSC divisions can produce symmetric or asymmetric daughter fates, giving rise to  
57 more NSCs, neurons, intermediate progenitors, and glia during corticogenesis. These stem cells  
58 must produce the right types and numbers of daughter cells within specific windows of time.  
59 With all these complex demands, the developing cortex is particularly vulnerable to insults to  
60 cell division.

61 We previously identified a mouse model of microcephaly that is recessive, perinatal  
62 lethal, and relatively severe, with a brain about half as thick as normal during late gestation. It  
63 carries a loss-of-function mutation in the kinesin microtubule motor gene *Kif20b*. The mutant  
64 brains do not display NSC mitotic arrest or abnormal cleavage angles, which have been noted  
65 in other microcephaly mutants. Instead, *Kif20b* mutant brains display defects in cytokinetic  
66 abscission (Dwyer et al., 2011; Janisch et al., 2013). Abscission is the process of severing the  
67 connection between mother and daughter cell, taking an hour or more after telophase (Mierzwa  
68 and Gerlich, 2014). The cleavage furrow compacts the central spindle microtubules into the  
69 midbody, which mediates abscission by recruiting proteins to remodel and “cut” the cytoskeleton  
70 and membrane. We showed that *Kif20b* protein localizes to the central spindle and midbody in  
71 human cell lines and mouse NSCs (Janisch, et al., 2013; 2018). Furthermore, *Kif20b* appears to  
72 facilitate changes in midbody microtubule structure as the midbody “matures” during the  
73 abscission process, and ensures timely abscission in cell lines. Suggesting that it may  
74 accelerate cell division, *Kif20b* is elevated in some cancers ((Kanehira et al., 2007; Liu et al.,

75 2014; Lin et al., 2018). Interestingly, *Kif20b* evolved with the vertebrate lineage, so its subtle role  
76 in abscission may be important for growing bigger, more complex nervous systems.

77 In addition to abnormal midbodies, *Kif20b* mutants (*Kif20b*<sup>-/-</sup>) also display increased  
78 apoptosis in the embryonic cortex from E10.5 to E16.5 (Janisch et al., 2013). However, it was  
79 unclear whether the relatively small amount of detectable apoptosis observed could account for  
80 the severity of the microcephaly. Apoptosis appears to be relatively low in the healthy embryonic  
81 neocortex, but was seen to be elevated in some mouse models of brain malformations  
82 (Marthiens et al., 2013; Stottmann et al., 2013; Chen et al., 2014; Insolera et al., 2014;  
83 Marjanovic et al., 2015; Breuss et al., 2016). The intrinsic or stress-induced apoptotic pathway  
84 can be triggered by environmental stresses or genetic insults, such as particular mutations  
85 (Arya and White 2015). Bax and p53 (gene *Trp53*) are expressed in embryonic brain and  
86 appear to respond to damage. In response to apoptotic stimuli, Bax, a multi-BH domain-  
87 containing member of the BCL2 family, can form pores across the outer mitochondrial  
88 membrane, thereby releasing cytochrome C that can activate the caspase cascade. p53, a  
89 tumor suppressor mutated in many human cancers, is an upstream activator of Bax  
90 (Kasthuber and Lowe 2017). Mouse knockouts of *Bax* and *p53* have normal brain  
91 development with surprisingly few low penetrance defects (Knudson et al., 1995; Jacks et al.,  
92 1994; Insolera et al., 2014).

93 Here, we set out to determine the relative contributions of apoptosis and abscission  
94 dysregulation to the microcephaly of the *Kif20b* mutant, and to understand the relationship  
95 between these phenotypes. To do this, we crossed genetic mutants of the intrinsic apoptosis  
96 pathway to *Kif20b*<sup>-/-</sup> mice and asked whether the apoptosis, microcephaly, and abscission  
97 defects in *Kif20b* mutants were rescued, unaffected, or potentially worsened. To our surprise,  
98 we found that *p53* deletion prevented apoptosis and rescued brain size and structure to a  
99 remarkable degree. A partial apoptosis inhibition by *Bax* deletion correlated with a lesser extent  
100 of brain size rescue. Surprisingly, deletion of even one allele of *p53* is able to completely block  
101 the apoptosis and lethality in *Kif20b* mutants. However, *Kif20b*; *p53* double mutant brains are  
102 still smaller than controls at birth, suggesting *Kif20b* regulates cortical development through  
103 additional mechanisms, perhaps by ensuring timely abscission. Indeed, *p53* deletion does not  
104 rescue the defects in midbody structure seen in *Kif20b* mutant NSCs, and additional midbody  
105 defects are revealed when *p53* is deleted. Our data provides the first evidence that abscission  
106 defects can cause p53 activation in NSCs or any cell type, through a yet-to-be identified  
107 pathway. Finally, our work addresses apoptosis inhibition as a potential way to ameliorate the  
108 severity of microcephaly caused by genetic, viral, or environmental insults.

109 **RESULTS**

110

111 **The intrinsic apoptotic pathway is the key driver of microcephaly in *Kif20b*<sup>-/-</sup> mice**

112 To test whether the intrinsic apoptotic pathway mediates the elevated apoptosis and  
113 microcephaly in the *Kif20b* mutant cortex, we utilized genetic crosses to mutants in two key  
114 genes in this pathway, *Bax* and *p53* (*Trp53*). Importantly, homozygous deletion mutants in *Bax*  
115 or *p53* develop properly with normal size cortices (Knudson et al., 1995; Jacks et al., 1994;  
116 Insolera et al., 2014). First, we produced *Kif20b*; *Bax* double mutants. *Bax*, together with its  
117 partner *Bak*, increases the permeability of the mitochondrial membrane, increasing cytochrome  
118 c release (Westphal et al., 2011). We examined double mutant brains at age E14.5, when  
119 apoptosis is elevated 4-fold in *Kif20b* mutants, and the cortical plate has started to form.

120 Interestingly, embryos carrying homozygous mutations in both *Bax* and *Kif20b* showed a partial  
121 block of the elevated apoptosis and a partial rescue of cortical thickness (**Fig. 1A-H**).

122 Craniofacial defects observed in *Kif20b* mutants were not rescued by *Bax* mutation (data not  
123 shown). These data suggest that apoptosis and microcephaly are correlated, but that additional  
124 proteins are required for the full apoptotic response to *Kif20b* loss. For example, *Bak* is a  
125 partner of *Bax* and is partially redundant (Lindsten et al., 2000).

126 The tumor suppressor *p53* is upstream of *Bax*/*Bak* in the intrinsic apoptotic pathway.  
127 Therefore, we tested whether *p53* deletion could fully block the apoptosis in *Kif20b* mutants by  
128 crossing to the *Trp53*<sup>-/-</sup> mutant (Jacks et al., 1994). Strikingly, apoptosis and cortical thickness  
129 of E14.5 *Kif20b*<sup>-/-</sup> embryos are both fully rescued by either heterozygous or homozygous  
130 deletion of *p53* (**Fig. 2A-J**). Thus, two functional *p53* genes are required to produce the  
131 apoptosis and microcephaly triggered by *Kif20b* loss. Furthermore, *p53* is required for the  
132 craniofacial defects of *Kif20b*<sup>-/-</sup> embryos: either heterozygous or homozygous *p53* deletion  
133 significantly ameliorates the small eye and snout phenotypes (**Fig. S1**). *p53* protein appears to  
134 be elevated in *Kif20b* mutant cortices, as immunoblots of E12.5 cortical lysates show *p53* band  
135 intensity increased 50% in *Kif20b*<sup>-/-</sup> samples, normalized to the NSC protein beta-catenin (**Fig.**  
136 **S2 A, B**). Furthermore, immunostaining suggests this increase is specifically in the nuclei of  
137 NSCs (**Fig S2 C, D**). Together, these data show that *p53* is activated when *Kif20b* is lost, and  
138 *p53* function is required for the excess apoptosis and microcephaly in this mutant. Moreover, the  
139 partial and full rescues of microcephaly by *Bax* and *p53* deletion, respectively, show that that  
140 the amount of apoptosis and the severity of microcephaly are strongly correlated, suggesting  
141 that apoptosis is the key cellular mechanism driving microcephaly in *Kif20b*<sup>-/-</sup> mice.

142

143 ***p53* deletion restores growth of neuronal and subventricular layers in embryonic *Kif20b*-**  
144 ***- cortex***

145 We previously showed that the reduced cortical thickness of *Kif20b* mutants is due to  
146 thinner neuronal layers and fewer intermediate progenitors (IPs) (Janisch et al., 2013). To  
147 determine if *p53* deletion could rescue cortical neurogenesis and structure as well as thickness,  
148 we labeled *Kif20b*<sup>-/-</sup> single mutant and *Kif20b*; *p53* double mutant E14.5 cortical sections for  
149 Pax6, Tuj1, and Tbr2, to label NSCs, neurons, and IPs, respectively. In *Kif20b*<sup>-/-</sup> single mutant  
150 brains, as expected, the neuronal layer (cortical plate) and axonal layer (intermediate zone) are  
151 thin (**Fig. 3A, B, G**). Remarkably, *Kif20b*<sup>-/-</sup>; *p53*<sup>-/-</sup> embryos have cortices that appear to have  
152 normal organization, with cortical plates and intermediate zones indistinguishable from controls  
153 (**Fig. 3C, G**). Additionally, *Kif20b*<sup>-/-</sup>; *p53*<sup>-/-</sup> embryos display normal ventricular zone thickness  
154 and IP generation (**Fig. 3D-F, H, I**). Therefore, blocking apoptosis by *p53* deletion in the cortices  
155 of *Kif20b*<sup>-/-</sup> brains increased cortical thickness by improving production or survival of neurons  
156 and IPs. Furthermore, the rescued neurons and IPs appear to migrate normally and create a  
157 normal-appearing structure.

158

159 ***p53* deletion rescues postnatal survival but not full cortical size of *Kif20b*<sup>-/-</sup> mice at birth**

160 In addition to reduced brain size, *Kif20b*<sup>-/-</sup> mice exhibit perinatal lethality. Remarkably,  
161 while no *Kif20b* mutant mice with wild-type *p53* status survive the day of birth (postnatal day 0,  
162 “P0”), *Kif20b*<sup>-/-</sup> mice with heterozygous or homozygous *p53* deletion survive postnatally at  
163 expected Mendelian ratios (**Figure 4A**). Even more surprising, most *Kif20*<sup>-/-</sup>; *p53*<sup>+/-</sup> mice and  
164 *Kif20b*<sup>-/-</sup>; *p53*<sup>-/-</sup> mice live to adulthood and are fertile. Some *Kif20b*<sup>-/-</sup>; *p53*<sup>+/-</sup> mice (~15%) still  
165 have visible craniofacial defects including a small eye or short snout, and ~5% have  
166 hydrocephalus, but the majority have normal facial structure. Double homozygotes (*Kif20b*<sup>-/-</sup>;  
167 *p53*<sup>-/-</sup>) have even fewer craniofacial defects, but die prematurely at ~ 3 - 4 months of age due to  
168 spontaneous tumors, as do *p53*<sup>-/-</sup> single mutants (Jacks et al., 1994).

169 The postnatal survival of *Kif20b*<sup>-/-</sup>; *p53*<sup>-/-</sup> mice enabled us to investigate the requirement  
170 of *Kif20b* for corticogenesis without the confounding factor of excess apoptosis. First, we  
171 confirmed previous reports that *p53* knockout mice have normal cortical size at P0 (**Fig. 4 B, C**)  
172 (Insolera et al., 2014). Interestingly, in contrast to the full rescue of cortical thickness seen at  
173 E14.5 in *Kif20b*<sup>-/-</sup>; *p53*<sup>-/-</sup> brains, at P0 they show a 10% decrease in cortical length and a 20%  
174 reduction in cortical thickness compared to heterozygous controls (**Fig. 4 B- F**). Furthermore,  
175 the reduction is in the cortical plate and intermediate zone, but not the ventricular and  
176 subventricular zones (**Fig. 4G**). These data indicate that despite the dramatic improvements in

177 cortical growth and postnatal survival afforded by blocking p53-dependent apoptosis, a deficit in  
178 corticogenesis remains. Thus, while elevated apoptosis largely accounts for the microcephaly of  
179 the *Kif20b* mutant, proper cortical growth requires a *Kif20b* function that cannot be compensated  
180 by preventing apoptosis.

181

### 182 ***Kif20b* is required cell-autonomously for midbody maturation of cortical NSCs**

183 Previously we showed that *Kif20b* is expressed in germinal zones of the embryonic  
184 brain, and that Kif20b protein localizes to midbodies of dividing embryonic cortical neural stem  
185 cells at the ventricular surface (Janisch et al., 2013). We further showed that *Kif20b* mutants  
186 have abnormalities in NSC midbodies: they tend to be wider and less aligned to the apical  
187 membrane. These phenotypes could be due to a cell-autonomous requirement for Kif20b during  
188 abscission, or due to non-cell autonomous effects through cell-cell interactions at the apical  
189 membrane junctions, because cytokinesis in epithelia is a multicellular process (Herszterg et al.,  
190 2014). To further probe Kif20b's function in embryonic NSC division, we used dissociated  
191 cortical cell cultures.

192 Midbodies at various stages of maturation can be detected with tubulin and Aurora  
193 Kinase B (AurKB) staining by their characteristic shapes (**Fig. 5A-C**). Early-stage midbodies are  
194 wide (**Fig. 5A**), but become thinner as the midbody matures (Guizetti et al., 2011). At late  
195 stages, microtubule constriction sites (abscission sites) are detectable on one or both sides of  
196 the midbody center (**Fig. 5, B, C**, arrows) (Mierzwa and Gerlich et al., 2014). We found in  
197 human cell lines that Kif20b is recruited to early stage midbodies, and at late stages  
198 accumulates around the constriction sites (Janisch et al., 2018). Interestingly, *Kif20b*<sup>-/-</sup> NSC  
199 cultures have an increased frequency of wide midbodies (**Fig. 5D**), and fewer midbodies with at  
200 least one constriction site (**Fig. 5E**). These analyses show that *Kif20b* is required for normal  
201 NSC midbody maturation, and that this requirement is cell-autonomous.

202 Some other mouse models of microcephaly show increased mitotic index in the cortex,  
203 due to NSC mitosis delay or arrest (Marthiens et al., 2013; Chen et al., 2014; Insolera et al.,  
204 2014; Marjanovic et al., 2015; Breuss et al., 2016). We showed previously that the *Kif20b*  
205 mutant cortex does not have increased mitotic index (Janisch et al., 2013), but here we use the  
206 dissociated cortical cell cultures to address this possibility with higher cellular resolution. We  
207 assayed whether *Kif20b* mutant NSCs spent more time in mitosis or abscission than control  
208 NSCs by determining the mitotic and midbody index in cultures. Surprisingly, among cycling  
209 NSCs (Ki67+) in *Kif20b* mutant cultures, both the mitotic index and midbody index were not  
210 increased but were actually slightly reduced (**Fig. S3B**). This could suggest that *Kif20b* mutant

211 NSCs undergo mitosis and abscission more rapidly than control cells, or that some undergo  
212 apoptosis. To analyze relative durations of cell division phases, we categorized mitotic and  
213 midbody stage NSCs into sub-stages by PH3 and AurKB appearance (**Fig. S3A, C**). Among  
214 mutant NSCs at some stage of cell division, the percentages in prophase or  
215 prometa/metaphase were not different, but the percentage in anaphase/early telophase was  
216 slightly increased in *Kif20b* mutant cultures. These data are consistent with our previous results  
217 that early steps of cell division are not disrupted in *Kif20b* mutant NSCs, but that cytokinesis is  
218 affected (Janisch et al 2018).

219

### 220 ***Kif20b* loss activates apoptosis cell-autonomously in proliferating cortical NSCs**

221 An attractive hypothesis is that defective midbody maturation of NSCs in *Kif20b* mutants  
222 activates the intrinsic pathway of apoptosis in NSCs. However, our previous *in vivo* analysis  
223 could not distinguish whether the apoptotic cells in *Kif20b* mutant brains were NSCs or neurons,  
224 and whether apoptosis was triggered autonomously or by cell-cell interactions. Therefore, we  
225 used the dissociated cultures to distinguish these possibilities. Indeed, in cultures of *Kif20b*  
226 mutant cells after one day *in vitro*, apoptosis is elevated more than two-fold over controls (**Fig.**  
227 **6A, B, E**; arrows, CC3+ cells), suggesting that apoptosis is triggered autonomously.

228 Furthermore, neurons (TuJ1+) do not display increased apoptosis, while NSCs (Nestin+) do,  
229 and cycling NSCs (Ki67+) show a more pronounced increase (**Fig. 6 C, D, F**). This may explain  
230 the reduced mitotic and midbody indices among mutant NSCs (**Fig. S2B**), as some arrest in the  
231 cell cycle or die. Finally, since the elevated apoptosis in *Kif20b*<sup>-/-</sup> brains requires *p53* (**Fig. 2**),  
232 we wondered whether dissociated *Kif20b*<sup>-/-</sup> NSC apoptosis also requires *p53*. Indeed, in  
233 cultures from double mutant mice, the rate of apoptosis is similar to controls, showing that the  
234 elevated apoptosis in isolated *Kif20b*<sup>-/-</sup> NSCs is also *p53*-dependent (**Figure 6G**). Together,  
235 these data show that loss of *Kif20b* causes cell-intrinsic, *p53*-dependent apoptosis, specifically  
236 in cycling NSCs but not postmitotic neurons.

237

### 238 ***p53* deletion does not rescue impaired abscission in *Kif20b* mutant mice**

239 The preceding data show that in *Kif20b* mutant brains, the NSC apoptosis and  
240 microcephaly are downstream of *p53* activation. However, another important question is  
241 whether the midbody defects seen in *Kif20b* mutant mice, indicating an abnormal abscission  
242 process, are upstream or downstream of *p53* activation. Defects or delays in midbody  
243 maturation could activate *p53*. Alternatively, these midbody defects could be a consequence of  
244 *p53* activation, since *p53* can regulate many genes and processes. To distinguish these

245 possibilities, we tested whether abnormal midbody phenotypes observed in *Kif20b* mutant NSCs  
246 are rescued by *p53* deletion. First, we analyzed NSC midbody index in the dissociated cultures.  
247 As *Kif20b*<sup>-/-</sup> NSCs *in vitro* are less frequently observed at the midbody stage (**Figure S3B**), and  
248 we hypothesized this is due to NSC arrest or apoptosis, we predicted this phenotype would be  
249 rescued by *p53* deletion. In fact, the midbody index of *Kif20b*<sup>-/-</sup>; *p53*<sup>-/-</sup> NSCs is not merely  
250 rescued, but instead is significantly increased above controls (**Fig. 7A, B**). This is consistent  
251 with the notion that some *Kif20b*<sup>-/-</sup> midbody-stage NSCs die, and further suggests that if these  
252 cells are prevented from dying, they take longer to complete abscission than control cells. Next,  
253 we analyzed NSC midbody structure in dissociated cultures. Similar to *Kif20b*<sup>-/-</sup> midbodies,  
254 *Kif20b*<sup>-/-</sup>; *p53*<sup>-/-</sup> midbodies are significantly wider than controls (data not shown), and fewer of  
255 them have constriction sites (**Fig. 7C**). Thus, unlike apoptosis, the midbody width and  
256 constriction site phenotypes are not *p53*-dependent.

257 We next analyzed *Kif20b*<sup>-/-</sup>; *p53*<sup>-/-</sup> double mutant midbodies *in vivo* in E13.5 cortices.  
258 Cytokinesis is more complex in the cortical neuroepithelium than *in vitro*. NSC nuclei must  
259 migrate to the apical membrane to undergo mitosis and cytokinesis. During cytokinesis, the  
260 cleavage furrow ingresses asymmetrically from the basal side of the cell, forming the midbody at  
261 the apical membrane (Kosodo et al., 2008). To visualize NSC midbodies *en face*, we  
262 immunostained cortical slab whole-mounts for AurKB and the apical junction marker zona  
263 occludens-1 (ZO-1), and imaged the apical/ventricular surfaces (**Fig. 7D**). As *in vitro*, some  
264 midbodies are short and wide, and others are long and thin, since midbodies narrow as they  
265 mature (examples, **Fig. 7E**). In *Kif20b*<sup>-/-</sup> cortices, midbodies have a shifted width distribution,  
266 with an increased median width compared to controls (**Fig. 7F** and Janisch and Dwyer, 2016).  
267 Interestingly, we find that the *Kif20b*<sup>-/-</sup>; *p53*<sup>-/-</sup> double mutant cortices have a strikingly similar  
268 midbody width distribution as *Kif20b* single mutants, with the same median (**Fig. 7F**). Thus, this  
269 midbody maturation phenotype (width) *in vivo* is not rescued by *p53* deletion. But surprisingly,  
270 we find that midbody lengths, which are similar in controls and *Kif20b*<sup>-/-</sup> single mutants, are  
271 significantly longer in *Kif20b*<sup>-/-</sup>; *p53*<sup>-/-</sup> double mutants than in either *Kif20b*<sup>-/-</sup> single mutants or  
272 controls (**Fig. 7G**). Exceptionally long midbodies were observed after delayed abscission in cell  
273 lines that are resistant to apoptosis (Gromley et al., 2003; Weiderhold et al., 2016). Thus, *Kif20b*  
274 mutant NSCs may have delayed abscission, which can manifest as longer midbodies only if  
275 apoptosis is prevented. An additional midbody phenotype we observe *in vivo* in *Kif20b* mutant  
276 cortices is that about a third of NSC midbodies are not aligned parallel to the apical membrane,  
277 compared to ~15% in control brains (Janisch et al., 2013; **Fig. 7H, I**). The cause of this  
278 phenotype is unclear, but we used the *Kif20b*; *p53* double mutants to test whether it is *p53*-



279 dependent, perhaps due to the apoptotic process in dividing or neighboring cells. Interestingly,  
280 *p53* deletion did not prevent the misalignment phenotype, showing that it is not due to *p53*  
281 activation or apoptosis (**Fig 7I**). Taken together, these midbody analyses support the hypothesis  
282 that defective midbody maturation and alignment are primary consequences of *Kif20b* loss  
283 rather than secondary consequences of *p53* activation. Further, the additional midbody  
284 phenotypes detected in *Kif20b*<sup>-/-</sup>; *p53*<sup>-/-</sup> double mutant NSCs, namely increased midbody index  
285 and midbody length, are consistent with delayed midbody maturation in *Kif20b* mutant NSCs;  
286 however, these symptoms of delay are precluded in *Kif20b* mutants by *p53* activation and  
287 apoptosis.

288

## 289 **DISCUSSION**

290 Here we have tested the contribution of the intrinsic apoptosis pathway to the reduced  
291 cortex size in a lethal microcephaly model, the *Kif20b* mouse mutant. We have shown that  
292 apoptosis of cortical NSCs accounts for most of the microcephaly, but that there is a significant  
293 apoptosis-independent contribution as well, likely reflecting the importance of *Kif20b*'s role in  
294 abscission for corticogenesis. Furthermore, we showed that the excess apoptosis is partially  
295 dependent on *Bax*, and fully dependent on *p53*. Remarkably, heterozygous *p53* deletion is  
296 sufficient to fully suppress the lethality of the *Kif20b* mutant, and rescues the brain size equally  
297 as well as homozygous *p53* deletion. Lastly, we demonstrated that the NSC midbody maturation  
298 defects are not rescued by *p53* deletion, which indicates that they are not caused by *p53*  
299 activation, but may be upstream of *p53*. Thus, this work potentially identifies a novel midbody-  
300 initiated pathway for *p53* activation, and suggests that at least some types of microcephaly,  
301 although severe, could be greatly ameliorated by inhibiting apoptosis.

302 The genetic and cellular experiments herein support the following working model for the  
303 etiology of microcephaly in the *Kif20b* mutant (**Fig. 7J**). Midbody maturation defects in some  
304 *Kif20b*<sup>-/-</sup> NSCs cause *p53* activation by an unknown molecular pathway (dashed line). *p53* then  
305 triggers the apoptotic cascade including *Bax* and other effectors. Apoptosis depletes the NSC  
306 pool, thereby reducing the number of neuron and IP daughters produced, resulting in a small  
307 brain. There is likely some stochasticity to this process, as not all *Kif20b*<sup>-/-</sup> NSCs have midbody  
308 defects, and only a small percentage undergo apoptosis (Janisch et al., 2013; this work). It may  
309 be that apoptosis is only triggered if midbody maturation (and hence abscission) is delayed  
310 beyond a certain threshold. This would be analogous to a previous study in developing cortex  
311 showing that apoptosis likelihood increases if prophase is delayed past a threshold (Pilaz et al.,  
312 2016). Though both of these types of cell division delays trigger apoptosis through *p53*, the

313 molecular pathway upstream of p53 is likely distinct, since midbody maturation takes place well  
314 after telophase, in the next G1 phase (Gershony et al., 2014). In fact, how defects in early steps  
315 of mitosis signal to trigger p53 activation is only beginning to be elucidated, primarily in  
316 immortalized cell lines that are apoptosis-resistant (McKinley and Cheeseman 2017; Lambrus et  
317 al., 2016; Meitinger et al., 2016). The mechanism by which abscission delay could activate p53  
318 or apoptosis has not been addressed in any system. Much more work is needed to determine  
319 whether and how a midbody “error sensor” could directly or indirectly activate p53 in NSCs and  
320 other cell types. It remains possible that *Kif20b* loss causes p53 activation and midbody defects  
321 through two separate pathways. In either case, this mutant is a tool to elucidate a novel pathway  
322 to p53 activation, one that appears very sensitive in cortical neural stem cells.

323

### 324 **p53 activates apoptosis in NSCs following diverse cellular defects**

325 Our work furthers the evidence that p53 responds to multiple intrinsic cellular defects to  
326 acutely regulate NSC survival. Zika virus infection activates p53-dependent apoptosis in human  
327 NSCs (Ghouzzi et al., 2016). A handful of other microcephalic mouse mutants, with impaired  
328 DNA replication, mitosis, or cleavage furrowing, have implicated p53 in apoptosis and reduced  
329 brain size (Bianchi et al., 2017; Houlihan et al., 2014; Insolera et al., 2014; Marjanovic et al.,  
330 2015; Marthiens et al., 2013; Murga et al., 2009). Interestingly, inhibition of p53 in these mutants  
331 was sometimes able to increase cortical thickness, but in other cases worsened brain  
332 phenotypes (Marthiens et al., 2013; Murga et al., 2009). By contrast, *Kif20b*<sup>-/-</sup> embryonic brain  
333 structure and postnatal survival were well-rescued by even heterozygous deletion of *p53*.  
334 Heterozygous *p53* rescue has not been reported in other microcephaly mouse mutants. In the  
335 *Brca1* mutant, dwarfism but not microcephaly was rescued by heterozygous *p53* deletion (Xu et  
336 al., 2001). Thus, the *Kif20b*<sup>-/-</sup> microcephaly model is more severe in reduction of brain size  
337 compared to some other models, but it is also more easily rescuable by apoptosis inhibition. In  
338 fact, *p53* heterozygous or homozygous deletion can completely rescue the perinatal lethality of  
339 *Kif20b*<sup>-/-</sup> mice. This is important for eventual treatment of human microcephaly caused by  
340 genetic mutations or viruses, to determine which subtypes and phenotypes might be treatable  
341 by blocking apoptosis.

342

### 343 **A p53-independent consequence of Kif20b loss accounts for the remaining cortical size** 344 **deficit at birth**

345 The 20% deficit in cortical thickness in *Kif20b*; *p53* double mutant mice at birth indicates  
346 that even without the excess apoptosis, *Kif20b* mutant NSCs and neurons cannot create a brain

347 of normal size and structure, probably due to abnormal abscission causing some other problem  
348 in *Kif20b*<sup>-/-</sup>; *p53*<sup>-/-</sup> NSCs. The midbody maturation defects that are more frequent in *Kif20b*  
349 mutant brains may cause delays in daughter cell severing from the mother cell and delamination  
350 from the apical membrane in the case of neuronal daughters. It could also affect whether  
351 abscission occurs on both sides of the midbody or only one. The significance of the midbody  
352 misalignment increase is not clear, but here we showed that it is not caused by p53 activation or  
353 apoptosis. It is possible that Kif20b may help anchor or stabilize midbodies at the apical  
354 membrane via cell adhesion junctions until abscission is complete.

355         Aside from regulating abscission, Kif20b has postmitotic roles in cortical neurons that  
356 may contribute to cortical growth. We previously showed that *Kif20b* mutant embryonic cortical  
357 neurons in culture display a polarization defect and abnormalities in neurite growth and  
358 branching. Thus the deficit in thickness of the cortical plate at birth may be due to reduced  
359 neuropil. A key function of Kif20b is to enable tight microtubule packing: Kif20b has microtubule  
360 crosslinking activity *in vitro*, and in *Kif20b* mutant neurons, wider neurites and gaps in  
361 microtubule bundles were noted (Abaza et al., 2003; McNeely et al., 2017). Therefore, Kif20b  
362 may help to crosslink microtubules in both NSC midbodies and neuronal axons.

363

### 364 **Elucidating the heterogeneous mechanisms of brain malformations requires many** 365 **genetic models and culture systems**

366         Defects in cytokinetic abscission mechanisms could underlie a range of poorly  
367 understood microcephalies and related brain malformations. For example, human genetic  
368 studies in two different families showed that a very severe prenatal lethal  
369 microcephaly/anencephaly is caused by mutations in the gene encoding the key abscission  
370 protein Cep55 (OMIM Ref #236500) (Frosk et al., 2017; Bondeson et al., 2017) Cep55  
371 depletion in cell lines causes more severe midbody structural defects and abscission delay than  
372 *Kif20b* depletion does (Zhao et al., 2006). Patients with *Kif20b* loss-of-function mutations have  
373 not yet been identified, so it remains to be seen whether the severity of single-cell abscission  
374 phenotypes correlates with the severity of brain malformation. Cell lines such as HeLa cells can  
375 model some abscission defects, for example midbody maturation, but not others, such as  
376 midbody positioning at the apical membrane, p53 activation, or apoptosis. Our studies of the  
377 *Kif20b* mouse model provide human geneticists with a candidate gene and cellular markers for  
378 syndromes involving peri- or prenatal lethality, microcephaly, craniofacial defects, or  
379 microphthalmia. Comparing mouse models for abscission genes with other microcephalic mice

380 as well as human phenotypes will help us understand the heterogeneous etiologies of and  
381 potential diagnosis and treatments for these devastating conditions.

382

383

## 384 **MATERIALS AND METHODS**

385

386 **Mice:** Mouse colonies were maintained in accordance with NIH guidelines and policies  
387 approved by the IACUC. Embryos were harvested by caesarean section, and the morning of the  
388 vaginal plug was considered embryonic day (E) 0.5. Littermate embryos served as controls for  
389 all experiments. The *Kif20b*<sup>magoo</sup> allele, as previously described (Janisch et al., 2013) is  
390 maintained on both C57BL/6 and FVB/N backgrounds, and 50/50% mixed background embryos  
391 are used for experiments. *Trp53*<sup>tm1Tyj</sup> mice on C57BL/6 background were obtained from The  
392 Jackson Laboratory (JAX stock #002101) (Jacks et al., 1994). Mixed BL6/FVB/N background  
393 *Bax*<sup>tm1Sjk</sup> mice were a gift from Christopher Deppmann (JAX stock #002994) (Knudson et al.,  
394 1995). Sex of embryonic mice were not noted as sex was not a relevant biological variable for  
395 these experiments. The specific ages of embryonic mice used is noted in figure legends for  
396 each experiment.

397

398 **Cortical cell cultures:** Cells were dissociated from E12.5 cortices following a protocol adapted  
399 from Sally Temple's lab (Qian et al., 1998). The Worthington Papain Dissociation Kit was used  
400 to dissociate cells (Worthington Biochemical Corporation, Cat # LK003150). Cells were cultured  
401 in DMEM with Na-Pyruvate, L-Glutamine, B-27, N2, N-acetyl-cysteine and basic Fibroblast  
402 Growth Factor (bFGF). After 24 hours, cells were fixed by adding an equal volume of room-  
403 temperature 8% PFA for 5 minutes to cell media, followed by removal of media and addition of -  
404 20° cold methanol for 5 minutes.

405

406 **Apical slab preparation:** Apical slabs were prepared as previously described (Janisch and  
407 Dwyer, 2016). The meninges and skull were removed to expose the brain in E13.5 embryos,  
408 followed by fixation with 2% PFA for 20 minutes. Next, apical slabs were made by pinching off  
409 cortices, flipping so that the apical surface was upright, and trimming to flatten the slab. Slabs  
410 were fixed for another 2 minutes with 2% PFA followed by blocking with 5% normal goat serum  
411 (NGS) for 1 hr. Primary antibodies were applied for 1 hr. at room temperature and then moved  
412 to 4° overnight. The next day, after 3, 10-minute PBS washes secondary antibodies and DAPI

413 were applied at a concentration of 1:200 for 30 minutes. After two more 10 minute PBS washes  
414 slabs were coverslipped with VectaShield fluorescent mounting medium (Vector Laboratories  
415 Inc., H-1000) and imaged. z-stack depth was 8-20  $\mu\text{m}$  and step size was 0.5  $\mu\text{m}$ . Midbodies  
416 were considered misaligned if the two halves of the midbody were not in the same z-plane or  
417 within two adjacent z-planes.

418

419 **Immunoblotting:** Brain lysates were prepared with RIPA lysis buffer (150 mM NaCl, 1% NP40,  
420 0.5% sodium deoxycholate, 0.1% SDS, 50 mM Tris-HCl pH 8) with protease and phosphatase  
421 inhibitors. Protein concentration in lysates was determined by bicinchoninic acid (BCA) assay,  
422 and 60  $\mu\text{g}$  total protein was loaded per lane on 4-20 gradient% polyacrylamide gels. Proteins  
423 were transferred by electroblotting onto a 0.2  $\mu\text{m}$  PVDF membrane overnight at 30 mA.  
424 Membranes were blocked in 150 mM NaCl, 100 mM Tris-HCl pH 7.5 and 0.5% Tween 20  
425 (TBST) with 5% dried milk (blocking buffer) for 1 hour. Primary antibodies were incubated with  
426 the membrane overnight at 4°C. After three washes, LI-COR IRDye 800 CW goat anti-rabbit IgG  
427 and 680 RD goat anti-mouse secondary antibodies were applied (1:10000) in blocking buffer for  
428 1 hour at room temperature. After washing with TBST for 5 minutes, 3 times, immune  
429 complexes were visualized using a LI-COR western blot imager.

430

431 **Immunostaining:** To collect cryosections for IHC, age E14.5 and P0 brains were removed from  
432 heads and fixed for 6 and 24 hours, respectively, in 4% PFA, followed by immersion in 30%  
433 sucrose in PBS overnight. Next, whole brains were embedded in OTC (Tissue-Tek, 4583) and  
434 cryosections were cut at 20  $\mu\text{m}$  thickness and collected on Superfrost Plus slides (Fisher  
435 Scientific, 12-550-15). Frozen sections were stored at -80 degrees. Prior to immunostaining,  
436 cryosections were warmed to room temperature, then if antigen retrieval was needed, immersed  
437 in 10 mM citrate buffer at 95 degrees for 20 minutes. After cooling, sections were blocked in 2%  
438 NGS for 1 hour, followed by incubation with primary antibodies overnight at 4°C. The next day,  
439 after PBS washes sections were incubated with AlexaFluor secondary antibodies at 1:200 and  
440 DAPI at 1:100 for 30 minutes followed by PBS washes and coverslipping with VectaShield  
441 fluorescent mounting medium. For IF on coverslips of dissociated cortical progenitors, a similar  
442 protocol was used but with primary antibodies applied for 3 hours at room temperature, and  
443 antigen retrieval was not used. Coverslips were mounted on Superfrost Plus slides with Fluoro-  
444 Gel (Electron Microscopy Sciences, 17985-10).

445

446 **Antibodies:** Antibodies used in this analysis were rabbit polyclonal anti-human cleaved-  
447 caspase 3 (Cell-Signaling 9661S, 1:250), mouse monoclonal anti-rat beta-III-tubulin (Tuj1)  
448 (BioLegend 801201, 1:500), rat monoclonal anti-mouse Tbr2 (ebioscience 14-4875, 1:200),  
449 rabbit polyclonal anti-mouse Pax6 (BioLegend PRB-278P, 1:200), Aurora B kinase mouse  
450 monoclonal anti-rat (BD Biosciences 611082, 1:300), rabbit polyclonal anti-human alpha-tubulin  
451 (Thermo Scientific RB-9281-P0, 1:300), rat monoclonal alpha-tubulin (Novus Biologicals NB600-  
452 506, 1:300), rabbit monoclonal anti-human PH3 (Cell Signaling 3458, 1:200), chicken polyclonal  
453 anti-mouse Nestin (Aves Labs NES, 1:600), rat monoclonal anti-human Ki67 (eBioscience 14-  
454 5698, 1:100), mouse monoclonal anti-human p53 (Millipore 05-224, 1:250), rabbit polyclonal  
455 anti-mouse p53 (Leica Biosystems NCL-L-p53-CM5p, 1:500), rabbit polyclonal anti-human  
456 Beta-Catenin (Sigma-Aldrich SAB4500545 1:1000), and polyclonal rabbit anti Zo-1 (rabbit,  
457 Invitrogen 61-7300, 1:50). All antibodies were validated for the application used in multiple  
458 previous publications.

459 Images were collected on either a Zeiss Axio ImagerZ1 microscope with AxioCam MRm  
460 (Figures 1, 2, 3, 5 6 and 7A-C), a Zeiss AxioObserver fluorescent widefield inverted scope  
461 microscope (Figures 1, 2 and 3), an inverted DeltaVision with TrueLight deconvolution  
462 microscope and softWoRx Suite 5.5 image acquisition software (Applied Precision) (Figure 7D-  
463 J), or a Leica MZ16F microscope with DFC300FX camera (Figure 2, H&E and Figure 4).

464 **Control and mutant fluorescence images were collected with the same exposure times**  
465 **and on the same day.** All image analysis was performed in ImageJ/Fuji and any changes to  
466 brightness and contrast were applied uniformly across images. Statistical analyses were  
467 performed using Excel (Microsoft) or GraphPad PRISM software. The sample sizes were pre-  
468 determined based on our labs previous experience with cortical development analyses and  
469 others' published results. After obtaining pilot data, power analyses were performed if necessary  
470 to determine if the number of samples obtained was high enough for the effect size seen. NSC  
471 cultures that were unhealthy were not imaged and analyzed, but no other data was excluded  
472 from the analysis. No randomization or blinding was used as no experimental manipulation was  
473 applied other than genetic knockouts. Genotyping was performed after collection of embryos to  
474 determine genetic status. Statistical tests used are specified in each figure legend. For each  
475 sample set a statistical test of normality was performed using GraphPad PRISM software.  
476 Parametric tests were used when sample sets had a normal distribution and non-parametric  
477 tests were used when sample sets did not have a normal distribution. Variance was calculated  
478 and was typically similar between groups. N's listed in figure legends indicate the number of

479 coverslips, brains and litters collected for each experiment. For each brain, at least three  
480 sections were imaged, and for each coverslip, at least 5, 20X pictures or 10, 40X pictures were  
481 analyzed.

482

### 483 **ACKNOWLEDGEMENTS**

484

485 We thank Chris Deppmann for use of the *Bax* mutant mouse line. We are grateful to Bettina  
486 Winckler, Jing Yu, Xiaowei Lu, Ann Sutherland, Todd Stukenberg and members of their labs, as  
487 well as Katrina McNeely for advice and discussion. We are grateful to Madison Hecht, Gabrielle  
488 Wolfe, Mackenzie Shannon, Haley Hopkinson and Adriana Ehlers for help with cryosectioning  
489 and data analysis. This work was supported by the National Institutes of Health (R01 NS076640  
490 to NDD), the UVA Medical Scientist Training Program (MSTP T32 GM 7267-37) and the UVA  
491 Cell and Molecular Biology Training Grant (2T32GM008136-31A1).

492

493 **COMPETING INTERESTS:** No competing interests declared.

494

### 495 **REFERENCES**

496

497 **Abaza, A., Soleilhac, J.M., Westendorf, J., Piel, M., Crevel, I., Roux, A. and Pirollet, F.**  
498 (2003). M phase phosphoprotein 1 is a human plus-end-directed kinesin-related protein required  
499 for cytokinesis. *J Biol. Chem.* **278**(30): 27844-27852.

500

501 **Arya, R. and White, K. (2015).** Cell death in development: Signaling pathways and core  
502 mechanisms. *Semin Cell Dev Biol.* **39**:12-9.

503

504 **Bianchi, F.T., Tocco, C., Pallavicini, G., Liu, Y., Verni, F., Merigliano, C., Bonaccorsi, S.,**  
505 **El-Assawy, N., Priano, L., Gai, M., Berto, G.E., Chiotto, A.M., Sgro, F., Caramello, A.,**  
506 **Tasca, L., Ala, U., Neri, F., Oliviero, S., Mauro, A., Geley, S., Gatti, M. and Di Cunto, F.**  
507 (2017). Citron Kinase Deficiency Leads to Chromosomal Instability and TP53-Sensitive  
508 Microcephaly. *Cell Reports.* **18**(7): 1674-1686.

509 **Bondeson, M.L, Ericson, K., Gudmundsson, S., Ameer, A., Ponten, F., Westrom, J.,**

510 **Frykholm, C. and Wilbe, M. (2017).** A nonsense mutation in CEP55 defines a new locus for a

511 Meckel-like syndrome, an autosomal recessive lethal fetal ciliopathy. *Clin Genet.* **92**(5): 510-  
512 516.

513

514 **Breuss, M. Fritz, T. Gstrein, T., Chan, K., Ushakova, L., Yu, N., Vonberg, F.W., Werner, B.,**  
515 **Elling, U., and Keays, D.A.** (2016). Mutations in the murine homologue of TUBB5 cause  
516 microcephaly by perturbing cell cycle progression and inducing p53-associated apoptosis.  
517 *Development.* **143**(7): 1126-33.

518

519 **Chen, J.F., Zhang, Y., Wilde, J., Hansen, K.C., Lai, F. and Niswander, L.** (2014).  
520 Microcephaly disease gene *Wdr62* regulates mitotic progression of embryonic neural stem cells  
521 and brain size. *Nat Commun.* **5**:3885.

522

523 **Duerinckx, S. and Abramowicz, M.** (2018). The genetics of congenitally small brains. *Semin*  
524 *Cell Dev Biol.* **76**:76-85.

525

526 **Dwyer, N.D., Manning, D.K., Moran, J.L., Mudbhary, R., Fleming, M.S., Favero, C.B., Vock,**  
527 **V.M., O'Leary, D.D., Walsh, C.A. and Beier, D.R.** (2011). A forward genetic screen with a  
528 thalamocortical axon reporter mouse yields novel neurodevelopment mutants and a distinct  
529 *Emx2* mutant phenotype. *Neural Dev.* **6**(1):3.

530

531 **Dwyer, N.D., Chen, B. Chou, S.J., Hippenmeyer, S. Nguyen, L. and Ghashghaei, H.T.**  
532 (2016). Neural Stem Cells to Cerebral Cortex: Emerging Mechanisms of Regulating Progenitor  
533 Behavior and Productivity. *J Neurosci.* **36**(45): 11394-11401.

534

535 **Frosk, P., Arts, H.H., Philippe, J., Gunn, C.S., Brown, E.L., Chodirker, B., Simard, L.,**  
536 **Majewski, J., Fahiminiya, S., Russell, C., Liu, Y.P., Hegele, R., Katsanis, N., Goerz, C., Del**  
537 **Bigio, M.R. and Davis, E.E.** (2017). A truncating mutation in *CEP55* is the likely cause of  
538 MARCH, a novel syndrome affecting neuronal mitosis. *J Med Genetics.* **54**(7): 490-501.

539

540 **Gershony, O., Pe'er, T., Noach-Hirsh, M., Elia, N. and Tzur, A.** (2014). Cytokinetic abscission  
541 is an acute G1 event. *Cell Cycle.* **13**(21): 3436-3441.

542

543 **Ghouzzi, V.E., Bianchi, F.T., Molineris, I., Mounce, B.C., Berto, G.E., Rak, M., Lebon, S.,**  
544 **Aubry, L., Tocco, C., Gai, M., Chiotto, A.M., Sgro, F., Pallavicini, G., Simon-Loriere, E.,**



- 545 **Passemard, S., Vignuzzi, M., Gressens, P. and Di Cunto, F.** (2016). ZIKA virus elicits P53  
546 activation and genotoxic stress in human neural progenitors similar to mutations involved in  
547 severe forms of genetic microcephaly. *Cell Death Dis.* **7**(10):e2440.  
548
- 549 **Gromley, A., Jurczyk, A., Sillibourne, J., Halilovic, E., Mogensen, M., Groisman, I.,**  
550 **Blomberg, M. and Doxsey, S.** (2003). A novel human protein of the maternal centriole is  
551 required for the final stages of cytokinesis and entry into S phase. *Journal of Cell Biology.*  
552 **161**(3); 535-45.  
553
- 554 **Guizetti, J., Schermelleh, L. Mantler, J., Maar, S., Poser, I., Leonhardt, H., Muller-Reichert,**  
555 **T. and Gerlich, D.W.** (2011). Cortical constriction during abscission involves helices of ESCRT-  
556 III-dependent filaments. *Science.* **331**(6024): 1616-20.  
557
- 558 **Herszterg, S., Pinheiro, D. and Bellaiche, Y.** (2014). A multicellular view of cytokinesis in  
559 epithelial tissue. *Trends Cell Biol.* **25**(5): 285-93.  
560
- 561 **Houlihan, S. and Feng, Y.** (2014). The scaffold protein Nde1 safeguards the brain genome  
562 during S phase of early neural progenitor differentiation. *Elife.* **3**:e03297.  
563
- 564 **Insolera, R., Bazzi, H., Shao, W., Anderson, K.V., and Shi, S.H.** (2014). Cortical  
565 neurogenesis in the absence of centrioles. *Nature Neuroscience.* **17**(11): 1528-35.  
566
- 567 **Janisch, K.M., Vock, V.M., Fleming, M.S., Shrestha, A., Grimsley-Myers, C.M., Rasoul,**  
568 **B.A., Neale, S.A., Cupp, T.D., Kinchen, J.M., Liem, K.F. Jr. and Dwyer, N.D.** (2013). The  
569 vertebrate-specific Kinesin-6, Kif20b, is required for normal cytokinesis of polarized cortical stem  
570 cells and cerebral cortex size. *Development.* **140**(23):4672- 4682.  
571
- 572 **Jacks, T., Remington, L., Williams, B.O., Schmitt, E.M., Halachmi, S., Bronson, R.T. and**  
573 **Weinberg, R.A.** (1994). Tumor spectrum analysis in p53-mutant mice. *Current Biology.* **4**(1): 1-  
574 7.  
575
- 576 **Janisch, K.M. and Dwyer, N.D.** (2016). Imaging and quantitative analysis of cytokinesis in  
577 developing brains of Kinesin-6 mutant mice. *Methods in Cell Biology.* **131**:233-252.  
578

- 579 **Janisch, K.M., McNeely, K.C., Dardick, J.M., Lim, S.H. and Dwyer, N.D.** (2018). Kinesin-6  
580 KIF20B is required for efficient cytokinetic furrowing and timely abscission in human cells. *Mol*  
581 *Biol Cell.* **29**(2): 166-179.  
582
- 583 **Kanehira, M., Katagiri, T., Shimo, A., Takata, R., Shuin, T., Miki, T., Fujioka, T. and**  
584 **Nakamura, Y.** (2007). Oncogenic role of MPHOSPH1, a cancer-testis antigen specific to human  
585 bladder cancer. *Cancer Res.* **67**(7): 3276-85.  
586
- 587 **Kastenhuber, E.R. and Lowe, S.W.** (2017). Putting p53 in Context. *Cell.* **170**(6): 1062-1078.  
588
- 589 **Knudson, C.M., Tung, K.S., Tourtellotte, W.G., Brown, G.A. and Korsmeyer, S.J.** (1995).  
590 Bax-deficient mice with lymphoid hyperplasia and male germ cell death. *Science* **270**(5233): 96-  
591 9.  
592
- 593 **Kosodo, Y., Toida, K., Dubreuil, V., Alexandre, P., Schenk, J., Kiyokage, E., Attardo, A.,**  
594 **Mora-Bermudez, F., Arie, T., Clarke, J.D. and Huttner, W.B.** (2008). Cytokinesis of  
595 neuroepithelial cells can divide their basal process before anaphase. *Embo J.* **27**(23):3151-  
596 3163.  
597
- 598 **Lambrus, B.G., Daggubati, V., Uetake, Y., Scott, P.M., Clutario, K.M., Sluder, G. and**  
599 **Holland, A.J.** (2016). A USP28-53BP1-p53-p21 signaling axis arrests growth after centrosome  
600 loss or prolonged mitosis. *J Cell Biol.* **214**(2): 143-53.  
601
- 602 **Lin, W.F., Lin, X.L., Fu, S.W., Yang, L., Tang, C.T., Gao, Y.J., Chen, H.Y. and Ge, Z.Z.**  
603 (2018). Pseudopod-associated protein KIF20B promotes Gli1-induced epithelial-mesenchymal  
604 transition modulated by pseudopodial actin dynamic in human colorectal cancer. *Mol Carcinog.*  
605 Doi: 10.1002/mc.22812  
606
- 607 **Lindsten, T., Ross, A.J., King, A., Zong, W.X., Rathmell, J.C., Shiels, H.A., Ulrich, E.,**  
608 **Waymire, K.G., Mahar, P., Frauwirth, K., Chen, Y., Wei, M., Eng, V.M., Adelman, D.M.,**  
609 **Simon, M.C., Ma, A., Golden, J.A., Evan, G., Korsmeyer, S.J., MacGregor, G.R. and**  
610 **Thompson, C.B.** (2000). The combined functions of proapoptotic Bcl-2 family members bak  
611 and bax are essential for normal development of multiple tissues. *Mol Cell.* **6**: 1389-99.  
612

- 613 **Liu, X., Zhou, Y., Liu, X., Peng, A., Gong, H., Huang, L., Ji, K., Petersen, R.B., Zheng, L.**  
614 **and Huang, K.** (2014). MPHOSPH1: a potential therapeutic target for hepatocellular carcinoma.  
615 *Cancer Res.* **74**(22): 6623-34.  
616
- 617 **Marjanovic, M., Sanchez-Huertas, C., Terre, B., Gomez, R., Scheel, J.F., Pacheco, S.,**  
618 **Knobel, P.A., Martinez-Marchal, A., Aivio, S., Palenzuela, L., Wolfrum, U., McKinnon, P.J.,**  
619 **Suja, J.A., Roig, I., Costanzo, V., Luders, J. and Stracker, T.H.** (2015). CEP63 deficiency  
620 promotes p53-dependent microcephaly and reveals a role for the centrosome in meiotic  
621 recombination. *Nature Communications.* **6**:7676.  
622
- 623 **Marthiens, V., Rujano, M.A., Pennetier, C., Tessier, S., Paul-Gilloteaux, P. and Basto, R.**  
624 (2013). Centrosome amplification causes microcephaly. *Nat Cell Biol.* **15**(7):731-740.  
625
- 626 **Meitinger, F., Anzola, J.V., Kaulich, M., Richardson, A., Stender, J.D., Benner, C., Glass,**  
627 **C.K., Dowdy, S.F., Desai, A., Shiau, A.K. and Oegema, K.** (2016). *J Cell Biol.* **214**(2): 155-66.  
628
- 629 **Murga, M., Bunting, S., Montana, M.F., Soria, R., Mulero, F., Canamero, M., Lee, Y.,**  
630 **McKinnon, P.J., Nussenzweig, A. and Fernandez-Capetillo, O.** (2009). A mouse model of  
631 ATR-Seckel shows embryonic replicative stress and accelerated aging. *Nature Genetics.* **41**(8):  
632 891-8.  
633
- 634 **McKinley, K.L. and Cheeseman, I.M.** (2017). Large-Scale Analysis of CRISPR/Cas9 Cell-  
635 Cycle Knockouts Reveals the Diversity of p53-Dependent Responses to Cell-Cycle Defects.  
636 *Developmental Cell.* **40**(4): 405-420.  
637
- 638 **McNeely, K.C., Cupp, T.D., Little, J.N., Janisch, K.M., Shrestha, A. and Dwyer, N.D.** (2017).  
639 Mutation of Kinesin-6 Kif20b causes defects in cortical neuron polarization and morphogenesis.  
640 *Neural Development.* **12**:5.  
641
- 642 **Mierzwa, B. and Gerlich, D.W.** (2014). **Cytokinetic Abscission: Molecular Mechanisms and**  
643 **Temporal Control.** *Developmental Cell.* **31**:5 (525-538).  
644

645 **Pilaz, L.J., McMahon, J.J., Miller, E.E., Lennox, A.L., Suzuki, A., Salmon, E. and Silver,**  
646 **D.L.** (2016). Prolonged Mitosis of Neural Progenitors Alters Cell Fate in the Developing Brain.  
647 *Neuron*. **89**(1): 83-99.  
648  
649 **Qian, X., Goderie, S.K., Shen, Q., Stern, J.H. and Temple, S.** (1998). Intrinsic programs of  
650 patterned cell lineages in isolated vertebrate CNS ventricular zone cells. *Development*. **125**  
651 (3143-3152).  
652  
653 **Stottmann, R.W., Donlin, M., Hafner, A., Bernard, A. Sinclair, D.A. and Beier, D.R.** (2013). A  
654 mutation in *Tubb2b*, a human polymicrogyria gene, leads to lethality and abnormal cortical  
655 development in the mouse. *Hum Mol Genet*. **22**(20): 4053-63.  
656  
657 **Weiderhold, K.N., Fadri-Moskwik, M., Pan, J., Nishino, M., Chuang, C., Deeraksa, A., Lin,**  
658 **S.H. and Yu-Lee, L.Y.** (2016). Dynamic Phosphorylation of NudC by Aurora B in Cytokinesis.  
659 *PLoS One*. **11**(4):20153455.  
660  
661 **Westphal, D., Dewson, G., Czabotar, P.E. and Kluck, R.M.** (2011). Molecular biology of Bax  
662 and Bak activation and action. *Biochimica et Biophysica Acta (BBA) – Molecular Cell Research*.  
663 **1813**(4): 521-531.  
664  
665 **Xu, X., Qiao, W., Linke, S.P., Cao, L., Li, W., Furth, P.A., Harris, C.C. and Deng, C.** (2001).  
666 Genetic interactions between tumor suppressors Brca1 and p53 in apoptosis, cell cycle and  
667 tumorigenesis. *Nature Genetics*. **28**: 266-271.  
668  
669  
670  
671  
672  
673  
674

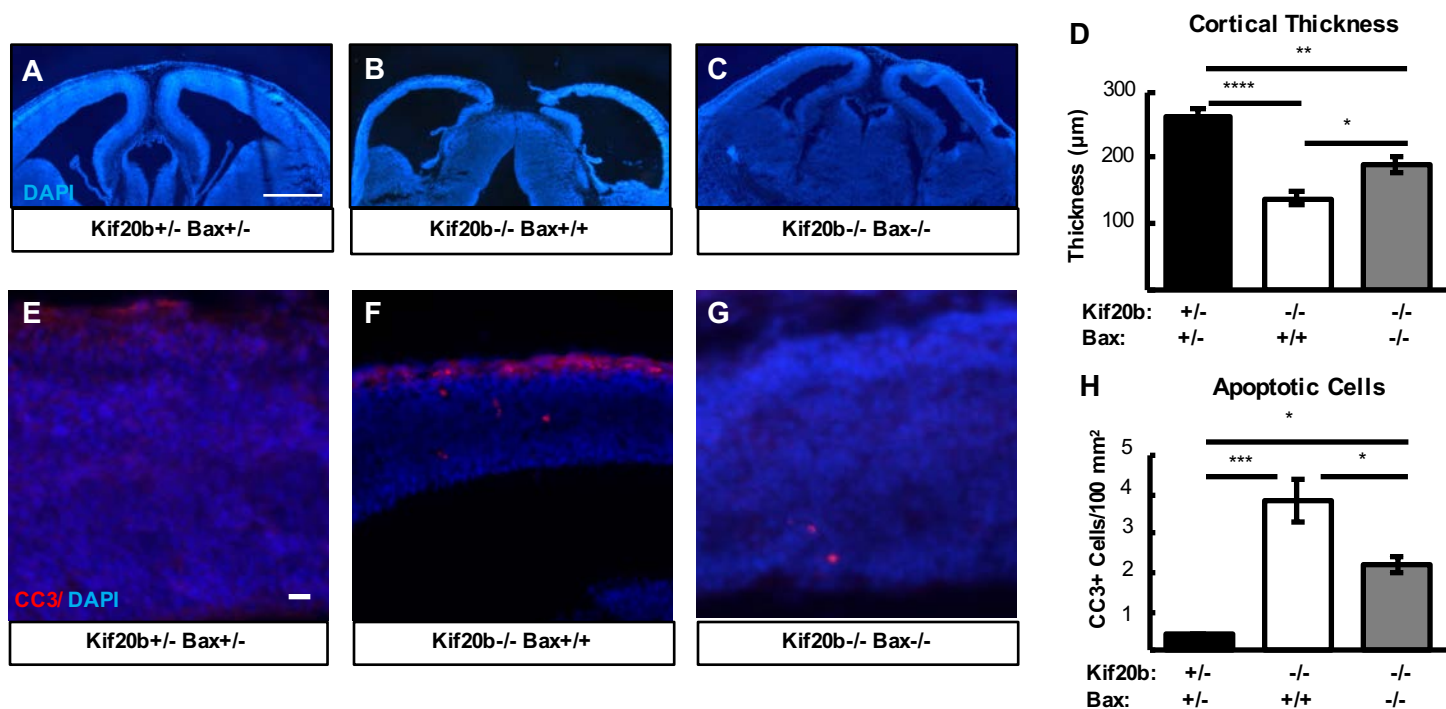

**Figure 1. Bax deletion partially rescues microcephaly and apoptosis in *Kif20b*<sup>-/-</sup> mice**

**A-D.** Representative E14.5 cortical sections, and plotted mean of cortical thicknesses show the severe reduction in *Kif20b* mutants is partly restored in *Kif20b*; *Bax* double mutants.

**E-H.** Cleaved caspase-3 (CC3) staining in E14.5 cortices shows the increased apoptosis in *Kif20b* mutants is partially reduced in *Kif20b*; *Bax* double mutants.

For (D, H), n = 5 *Kif20b*<sup>+/-</sup>; *Bax*<sup>+/-</sup>, 4 *Kif20b*<sup>-/-</sup>; *Bax*<sup>+/+</sup>, 5 *Kif20b*<sup>-/-</sup>; *Bax*<sup>-/-</sup> mice, from a total of 8 litters.

\* p < 0.05, \*\* p < 0.01, \*\*\* p < 0.001, \*\*\*\* p < .0001, one-way ANOVA. Error bars are +/- s.e.m. Scale bars: A: 500 μm; E: 20 μm.

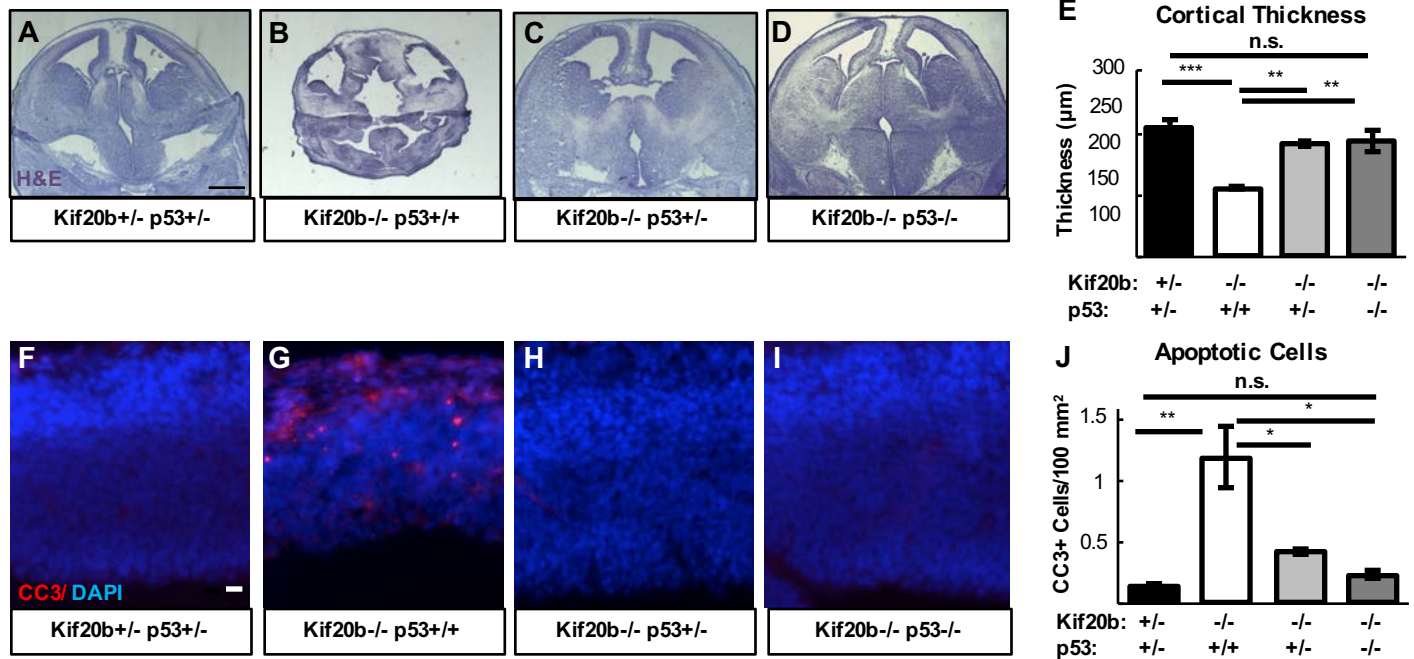

**Figure 2. p53 deletion rescues microcephaly and apoptosis in *Kif20b*<sup>-/-</sup> mice**

**A-E.** E14.5 cortical sections and plotted mean cortical thicknesses show the severe reduction in *Kif20b* mutants is fully rescued by heterozygous or homozygous *p53* deletion. n = 6 *Kif20b*<sup>+/-</sup>; *p53*<sup>+/-</sup>, 3 *Kif20b*<sup>-/-</sup>; *p53*<sup>+/-</sup>, 4 *Kif20b*<sup>-/-</sup>; *p53*<sup>+/-</sup>, 4 *Kif20b*<sup>-/-</sup>; *p53*<sup>-/-</sup> mice, from a total of 7 litters.

**F-J.** CC3 staining shows apoptosis in *Kif20b* mutants returns to control levels by heterozygous or homozygous *p53* deletion. n = 3 *Kif20b*<sup>+/-</sup>; *p53*<sup>+/-</sup>, *Kif20b*<sup>-/-</sup>; *p53*<sup>+/-</sup>, *Kif20b*<sup>-/-</sup>; *p53*<sup>+/-</sup>, *Kif20b*<sup>-/-</sup>; *p53*<sup>-/-</sup> mice, from a total of 6 litters.

\* p < 0.05, \*\* p < 0.01, \*\*\* p < 0.001, one-way ANOVA. Error bars are +/- s.e.m. Scale bars: A: 1 mm; F: 20µm.

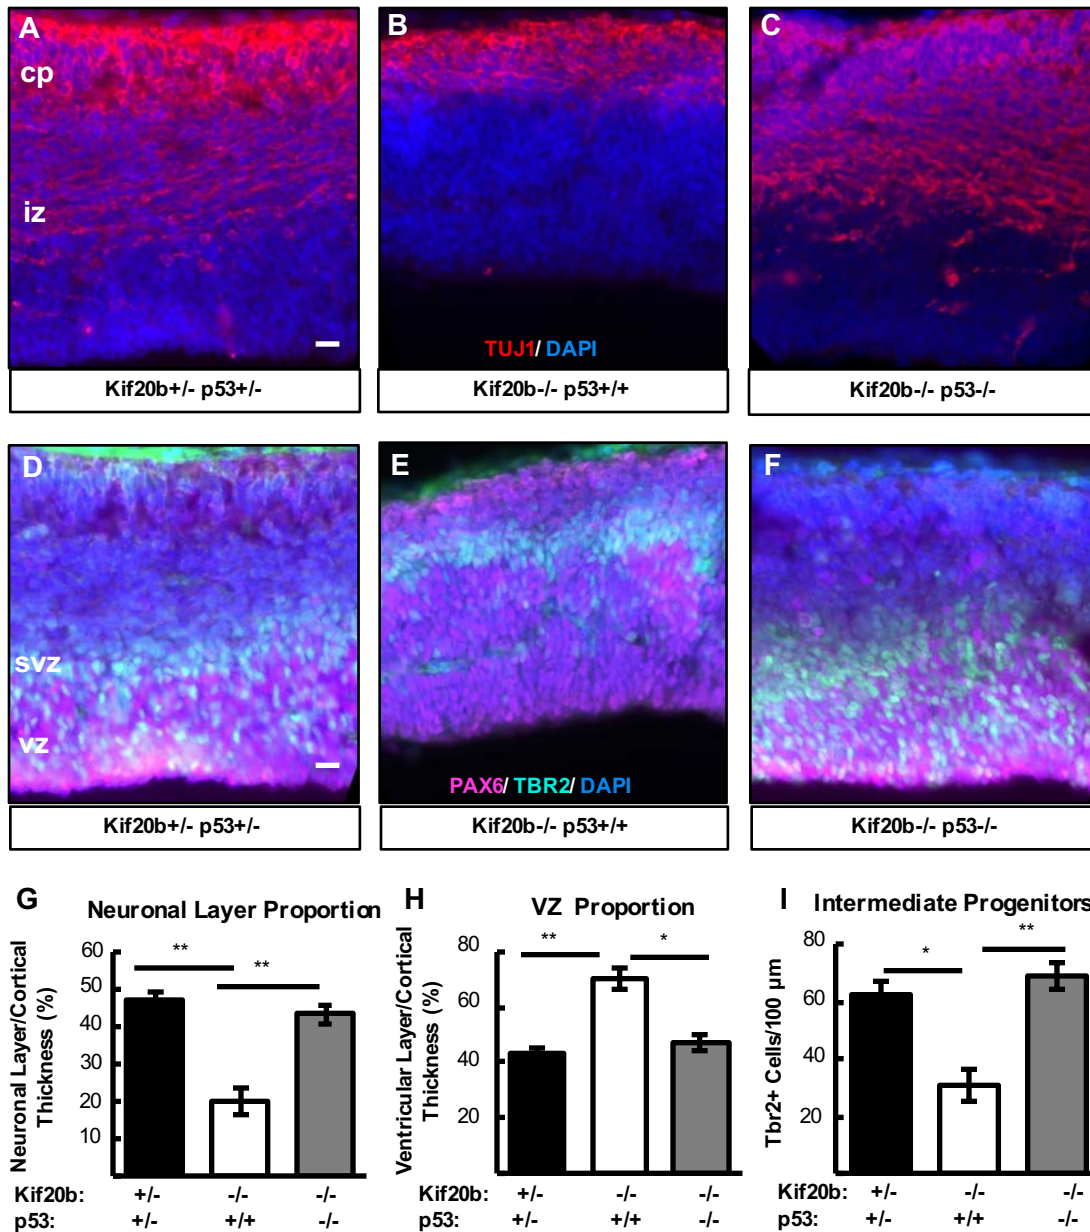

**Figure 3. *p53* deletion restores normal production of intermediate progenitors and neurons in *Kif20b*<sup>-/-</sup> cortex**  
**A-C.** E14.5 cortical sections labeled with neuronal-specific tubulin (TuJ1, red) show the decreased neuronal layer thickness in *Kif20b* mutants is rescued in *Kif20b*;*p53* double mutants. cp: cortical plate; iz: intermediate zone.  
**D-F.** E14.5 cortices labeled with Pax6 (NSCs, pink) and Tbr2 (IPs, green) show the altered layer proportions in *Kif20b* mutant are rescued by *p53* deletion. svz: subventricular zone; vz: ventricular zone.  
**G.** The mean neuronal layer proportional thickness is halved in *Kif20b* mutants but rescued by *p53* co-deletion.  
**H.** The proper NSC layer (Pax6+) proportionality is restored by *p53* co-deletion.  
**I.** The density of Tbr2+ IPs is reduced in *Kif20b* mutants, but rescued in *Kif20b*;*p53* double mutants. n = 3 each *Kif20b*<sup>+/-</sup>;*p53*<sup>+/-</sup>, *Kif20b*<sup>-/-</sup>;*p53*<sup>+/+</sup>, *Kif20b*<sup>-/-</sup>;*p53*<sup>-/-</sup> mice for TuJ1 and Pax6 layer thickness. n = 6 *Kif20b*<sup>+/-</sup>;*p53*<sup>+/-</sup>, 3 *Kif20b*<sup>-/-</sup>;*p53*<sup>+/+</sup>, 4 *Kif20b*<sup>-/-</sup>;*p53*<sup>-/-</sup> mice for Tbr2+ cell counts, from a total of 6 litters.  
 \* p < 0.05, \*\* p < 0.01, one-way ANOVA. Error bars are +/- s.e.m. Scale bars: 20 μm.

**A Mice alive on P0 (101 total observed)**

| Genotype                                                                                   | Observed | Expected   |
|--------------------------------------------------------------------------------------------|----------|------------|
| <i>Kif20b</i> <i>+/+</i> <i>or</i> <i>+/-</i> ; <i>p53</i> <i>+/+</i> <i>or</i> <i>+/-</i> | 58       | ~57 (9/16) |
| <i>Kif20b</i> <i>+/+</i> <i>or</i> <i>+/-</i> ; <i>p53</i> <i>-/-</i>                      | 22       | ~19 (3/16) |
| <i>Kif20b</i> <i>-/-</i> ; <i>p53</i> <i>+/+</i>                                           | 0        | ~6 (1/16)  |
| <i>Kif20b</i> <i>-/-</i> ; <i>p53</i> <i>+/-</i>                                           | 15       | ~13 (1/8)  |
| <i>Kif20b</i> <i>-/-</i> ; <i>p53</i> <i>-/-</i>                                           | 6        | ~6 (1/16)  |

**B**

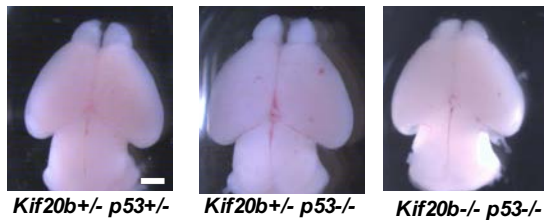

**C Cortical Length**

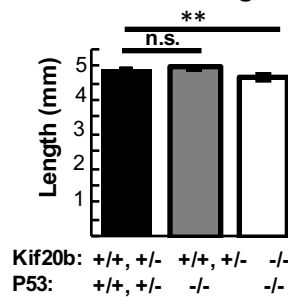

**D**

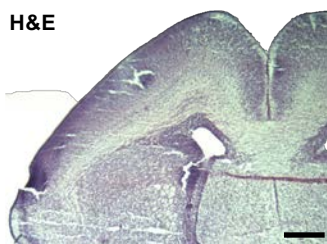

**D'**

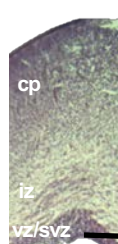

**E**

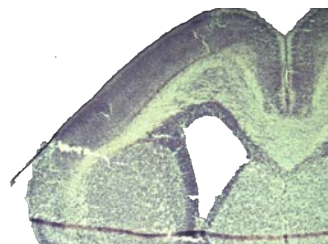

**E'**

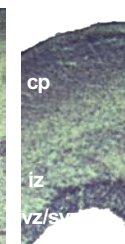

**F PO Total Cortical Thickness**

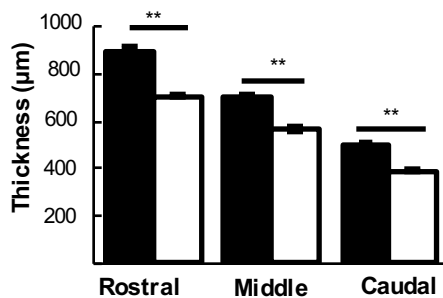

**G P0 Sublayer Thicknesses (middle sections)**

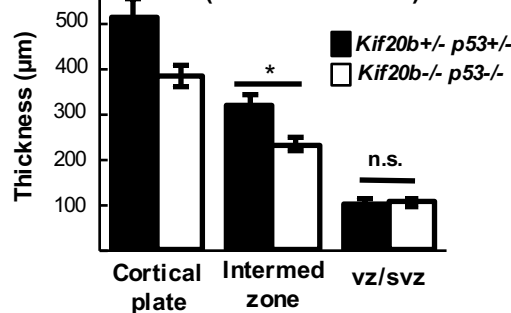

**Figure 4. *p53* deletion rescues postnatal survival but incompletely rescues cortical size at birth in *Kif20b*<sup>-/-</sup> mice**

**A.** *Kif20b*<sup>-/-</sup>; *p53*<sup>+/+</sup> mice do not survive at birth at expected Mendelian ratios, but *Kif20b*<sup>-/-</sup>; *p53*<sup>+/-</sup> and *Kif20b*<sup>-/-</sup>; *p53*<sup>-/-</sup> mice survive at comparable levels to controls.

**B,C.** The average length of *Kif20b*<sup>-/-</sup>; *p53*<sup>-/-</sup> mice is slightly decreased compared to controls at P0. N = 54 *Kif20b*<sup>+/+</sup> *or* *+/-* *p53*<sup>+/+</sup> *or* *+/-* mice, 22 *Kif20b*<sup>+/+</sup> *or* *+/-* *p53*<sup>-/-</sup>, and 5 *Kif20b*<sup>-/-</sup>; *p53*<sup>-/-</sup> mice.

**D, E.** Coronal sections from P0 rostral forebrains stained with hematoxylin and eosin (H&E) show reduced cortical thickness and enlarged ventricles of double mutants.

**F.** Cortical thickness in *Kif20b*<sup>-/-</sup>; *p53*<sup>-/-</sup> mice is reduced approximately 20% compared to controls in rostral, middle and caudal sections at P0.

**G.** Reduction is in the cortical plate (cp) and intermediate zone (iz) but not ventricular zone/subventricular zone (vz/svz) layers. For F and G N = 8 *Kif20b*<sup>+/+</sup>; *p53*<sup>+/-</sup> and 5 *Kif20b*<sup>-/-</sup>; *p53*<sup>-/-</sup> brains.

\*  $p < 0.05$ , \*\*  $p < 0.01$ , one-way ANOVA (C) and student's t-test (F,G). Error bars are +/- s.e.m. Scale bars: B: 1 mm; D: 200 µm; D': 100 µm.



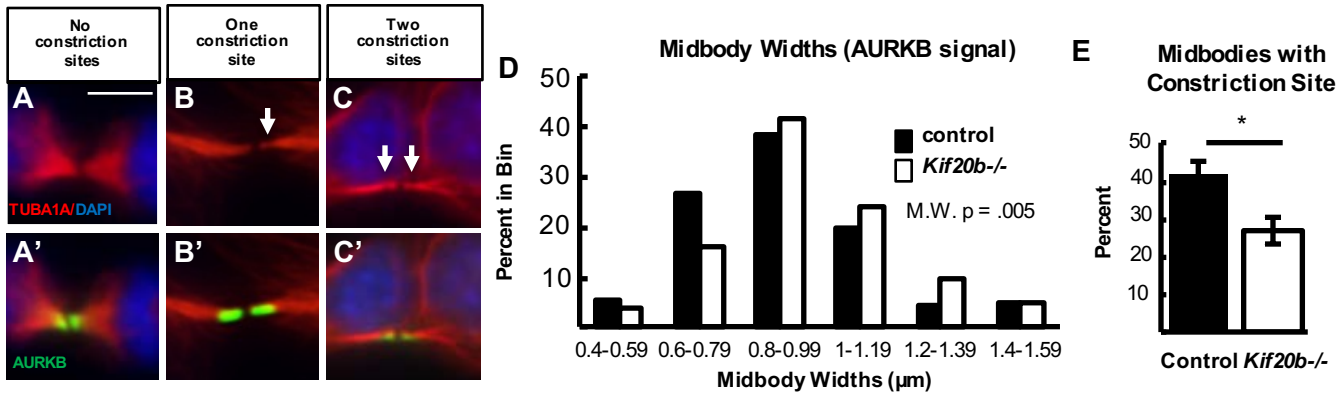

**Figure 5. *Kif20b* loss cell-autonomously causes abscission defects in cortical NSCs.**

**A-C.** Dissociated E 12.5 NSC midbodies at 24 hrs in culture labeled with alpha-tubulin (red) and Aurora kinase B (AurkB, green). Early-stage midbodies are wider with no constriction sites (A); late-stage midbodies are thinner and have one (B) or two (C) constriction sites (arrows).

**D.** *Kif20b*<sup>-/-</sup> midbodies have a significantly shifted width distribution, with more wide midbodies. (Medians: Control, 0.89 $\mu\text{m}$ ; mutant, 0.96 $\mu\text{m}$ ).

**E.** The mean percentage of midbodies with at least one constriction site (detected by tubulin) is significantly reduced in *Kif20b*<sup>-/-</sup> cultures.

n (D,E): 141 control, 125 mutant midbodies; 6 coverslips and 3 embryos each, 3 litters. D, Mann-Whitney; E, Student's t-test. Error bars are +/- s.e.m. All cultures from E 12.5 cortices and fixed after 24 hours. Scale bar in A: 5  $\mu\text{m}$

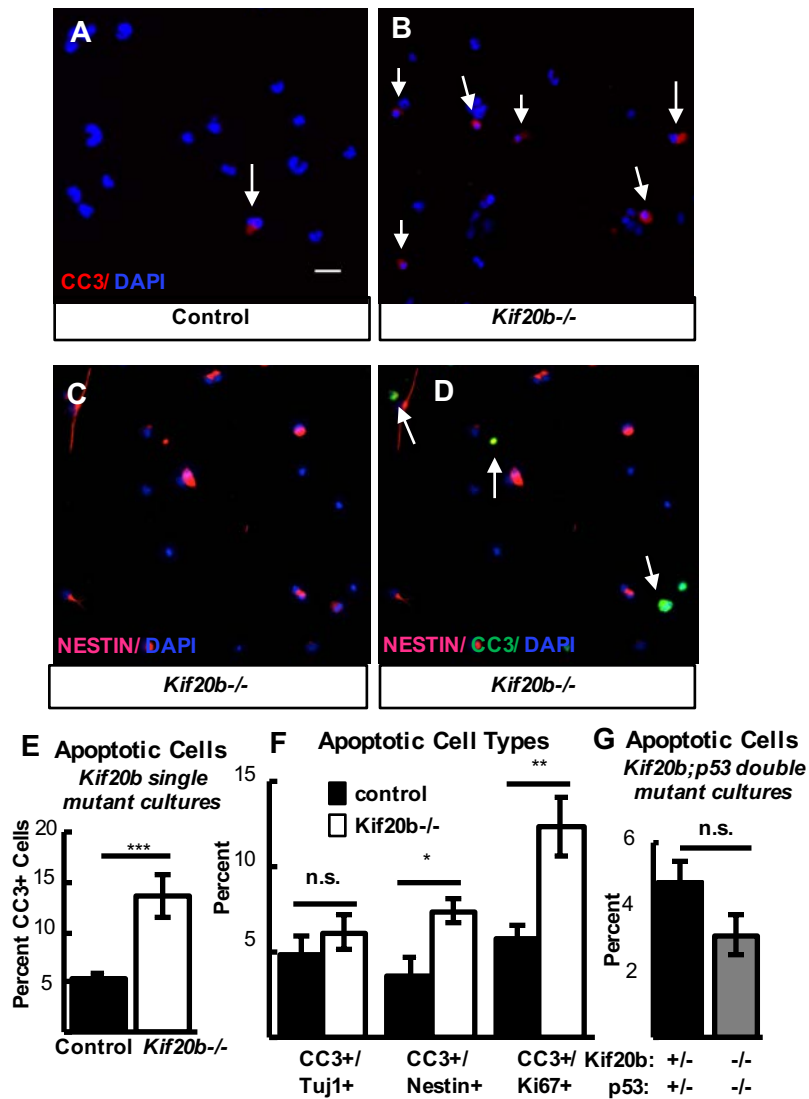

### Figure 6. *Kif20b* loss causes apoptosis in proliferating cortical NSCs

**A,B.** Representative fields of control (left) and *Kif20b*<sup>-/-</sup> (right) dissociated cortical cultures labeled with CC3 (red, arrows) for apoptotic cells.

**C,D.** Representative fields labeled with Nestin (NSCs, pink) and CC3 (green). Arrows in D indicate cells co-positive for Nestin/CC3.

**E.** The mean percentage of apoptotic cells in *Kif20b*<sup>-/-</sup> cortical cultures is increased (>2 fold) above controls. n = 13 control, 11 mutant coverslips; 8 and 7 brains, 7 litters.

**F.** The percent of apoptotic neurons (CC3+/Tuj1) is not increased in *Kif20b*<sup>-/-</sup> cultures, but the percents of apoptotic NSCs and proliferating NSCs (CC3+/Nestin+; CC3+/Ki67+) are significantly increased. Tuj1/CC3 analysis: n = 7 control, 6 mutant coverslips; 4 and 3 brains, 4 litters. Nestin/CC3 analysis: n = 7 control, mutant coverslips; 4 brains each, 3 litters. Ki67/CC3 analysis: n = 6 control, 5 mutant coverslips; 3 brains each, 3 litters.

**G.** Apoptosis is not increased in *Kif20b*<sup>+/-</sup>; *p53*<sup>+/-</sup>, 3 *Kif20b*<sup>-/-</sup>; *p53*<sup>-/-</sup> coverslips; 3 and 2 embryos, 2 litters. \* p < 0.05, \*\* p < 0.01, \*\*\* p < 0.001, Student's t-test. Error bars are +/- s.e.m. All cultures from E12.5 cortices and fixed after 24 hours. Scale bars in A: 20 μm.

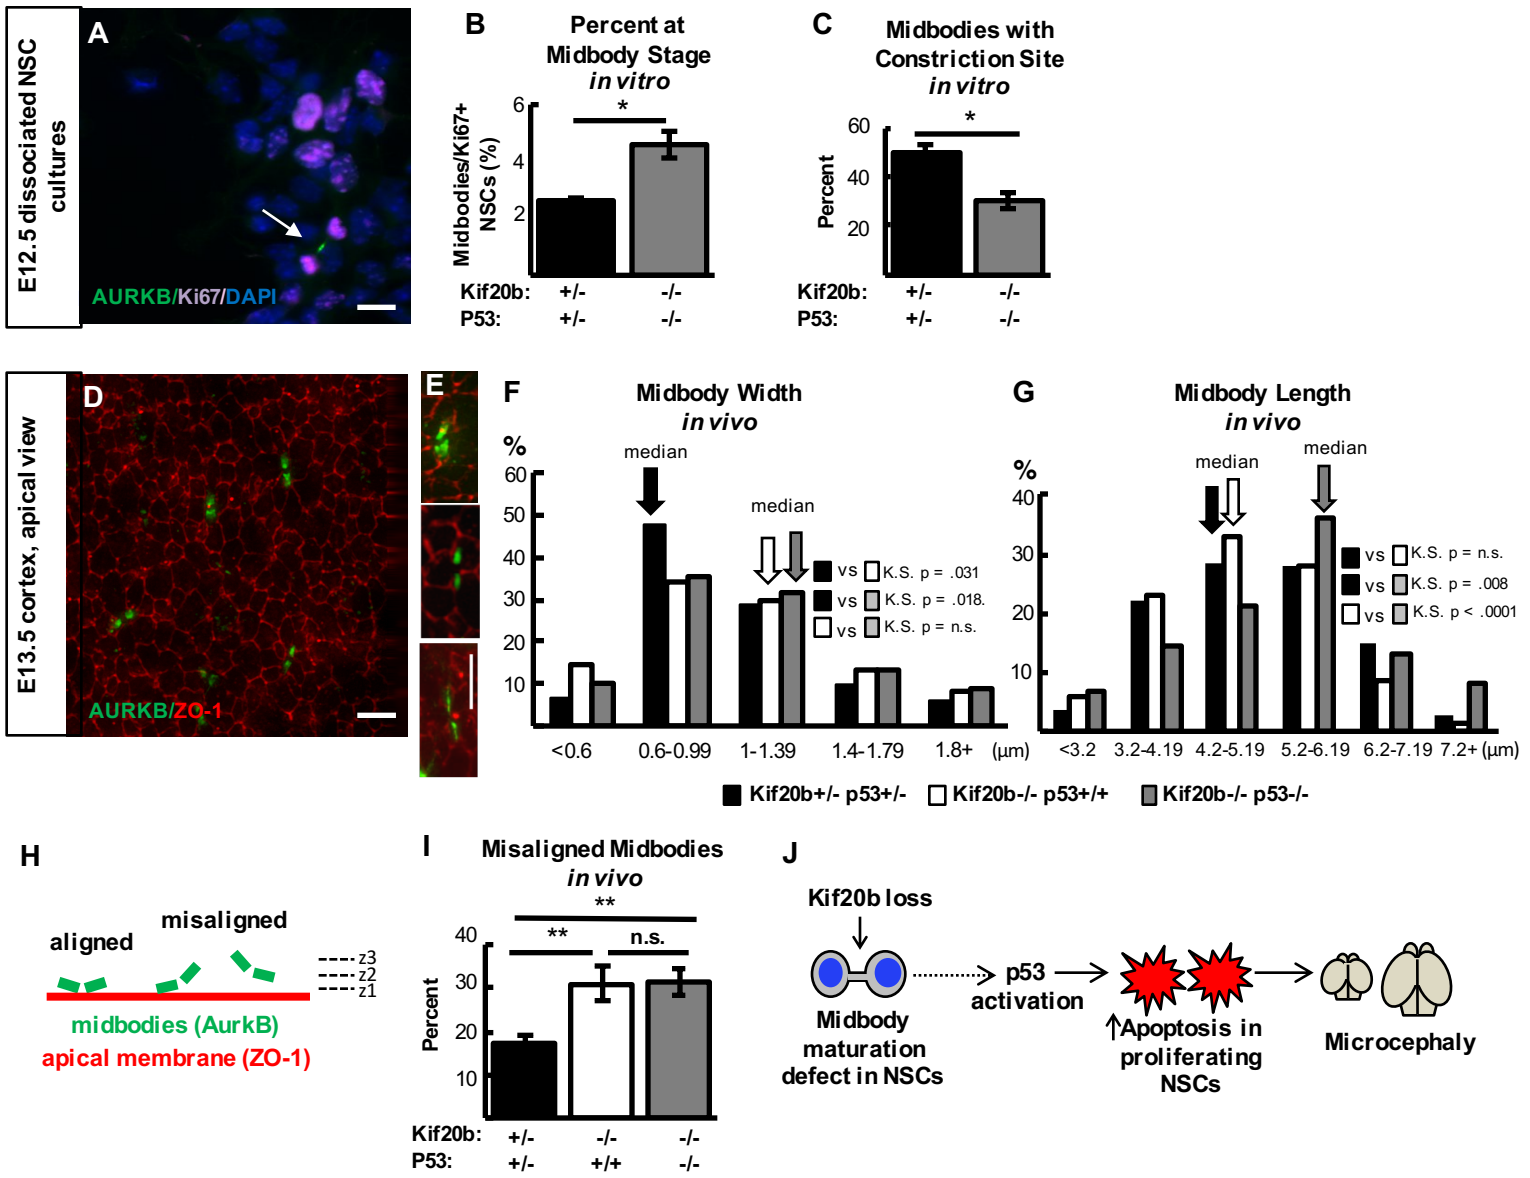

**Figure 7. *p53* deletion does not rescue abscission phenotypes of *Kif20b* mutant NSCs**

**A.** Representative image of E12.5 dissociated cortical cells, labeled with AurkB for midbodies (green, arrow), and Ki67 for proliferating NSCs (pink).

**B.** The mean percent midbody stage proliferating NSCs is significantly increased in *Kif20b*<sup>-/-</sup>;*p53*<sup>-/-</sup> cultures. n = 4 *Kif20b*<sup>+/-</sup>;*p53*<sup>+/-</sup>, 3 *Kif20b*<sup>-/-</sup>;*p53*<sup>-/-</sup> coverslips; 3 embryos each, 2 litters.

**C.** Of the NSCs at midbody stage, the percent with a constriction site is significantly reduced in *Kif20b*;*p53* cultures. n = 111 *Kif20b*<sup>+/-</sup>;*p53*<sup>+/-</sup>, 101 *Kif20b*<sup>-/-</sup>;*p53*<sup>-/-</sup> midbodies; 3 embryos each, 2 litters.

**D.** Representative image of E13.5 cortical slab, apical surface, labeled with ZO-1 (red, apical junctions) and AurkB (green, midbodies).

**E.** NSC midbodies range from short and wide (top) to long and thin (bottom).

**F.** The median midbody width is similarly increased in *Kif20b* single and *Kif20b*;*p53* double mutant cortices compared to controls. Median widths ( $\mu$ m) = 0.92 in *Kif20b*<sup>+/-</sup>;*p53*<sup>+/-</sup>, 1.0 in *Kif20b*<sup>-/-</sup>;*p53*<sup>+/-</sup>, 1.02 in *Kif20b*<sup>-/-</sup>;*p53*<sup>-/-</sup> cortices.

**G.** The median midbody length is similar in *Kif20b*<sup>-/-</sup> and control cortices, but is significantly increased in *Kif20b*<sup>-/-</sup>;*p53*<sup>-/-</sup> cortices. Median lengths ( $\mu$ m) = 4.82 in *Kif20b*<sup>-/-</sup>;*p53*<sup>+/-</sup>, 5.11 in *Kif20b*<sup>+/-</sup>;*p53*<sup>+/-</sup>, 5.43 in *Kif20b*<sup>-/-</sup>;*p53*<sup>-/-</sup> cortices. n for (F,G) = 346 *Kif20b*<sup>+/-</sup>;*p53*<sup>+/-</sup>, 189 *Kif20b*<sup>-/-</sup>;*p53*<sup>+/-</sup>, and 299 *Kif20b*<sup>-/-</sup>;*p53*<sup>-/-</sup> midbodies; 8, 5, and 7 cortical hemisphere slabs, 6, 4, and 5 embryos, 8 litters.

**H.** Schematic of aligned and misaligned midbodies relative to the apical membrane.

**I.** The percent misaligned midbodies is doubled in both *Kif20b*<sup>-/-</sup> and *Kif20b*<sup>-/-</sup>;*p53*<sup>-/-</sup> cortices compared to controls. n = 8 *Kif20b*<sup>+/-</sup>;*p53*<sup>+/-</sup>, 7 *Kif20b*<sup>-/-</sup>;*p53*<sup>+/-</sup>, 7 *Kif20b*<sup>-/-</sup>;*p53*<sup>-/-</sup> cortical slabs from 6, 4, and 6 embryos, respectively, 8 litters.

**J.** Working model. *p53* is required for NSC apoptosis and microcephaly caused by *Kif20b* loss but is not required for the midbody defects. How midbody defects lead to *p53* activation remains unknown (dotted arrow).

A-C are E12.5 cortical cultures fixed at 24 hrs. \*p < 0.05, \*\* p < 0.01, Student's t-test for (B,C); K.S. test for (F,G). Error bars are +/- s.e.m. Scale bars, 10  $\mu$ m.

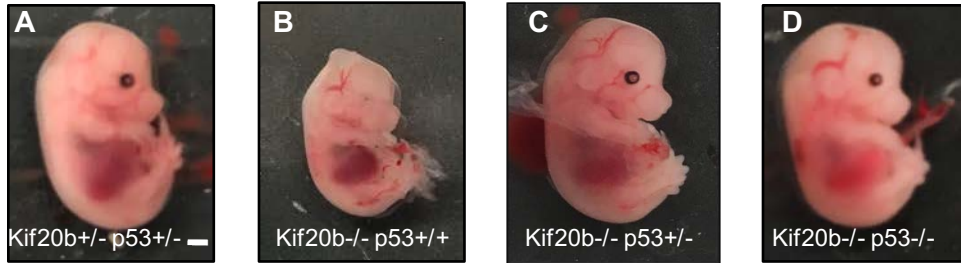

| <b>E</b>                                                               | <b>Percent with craniofacial defects</b> |
|------------------------------------------------------------------------|------------------------------------------|
| <b>Genotype</b>                                                        |                                          |
| <i>p53</i> <sup>-/-</sup> ; <i>Kif20b</i> <sup>+/+</sup> or <i>+/-</i> | 12% (2/17)                               |
| <i>p53</i> <sup>+/+</sup> ; <i>Kif20b</i> <sup>-/-</sup>               | 100% (3/3)                               |
| <i>p53</i> <sup>+/-</sup> ; <i>Kif20b</i> <sup>-/-</sup>               | 8% (1/12)                                |
| <i>p53</i> <sup>-/-</sup> ; <i>Kif20b</i> <sup>-/-</sup>               | 11% (1/9)                                |

**Supplemental Figure S1: *p53* deletion rescues craniofacial defects in *Kif20b* mutant mice.**

**A-D.** Representative E14.5 embryos of the indicated genotypes.

**E.** E14.5 embryos observed with craniofacial defects including shortened snout, underdeveloped eyes, and/or brain malformations of the indicated genotypes.

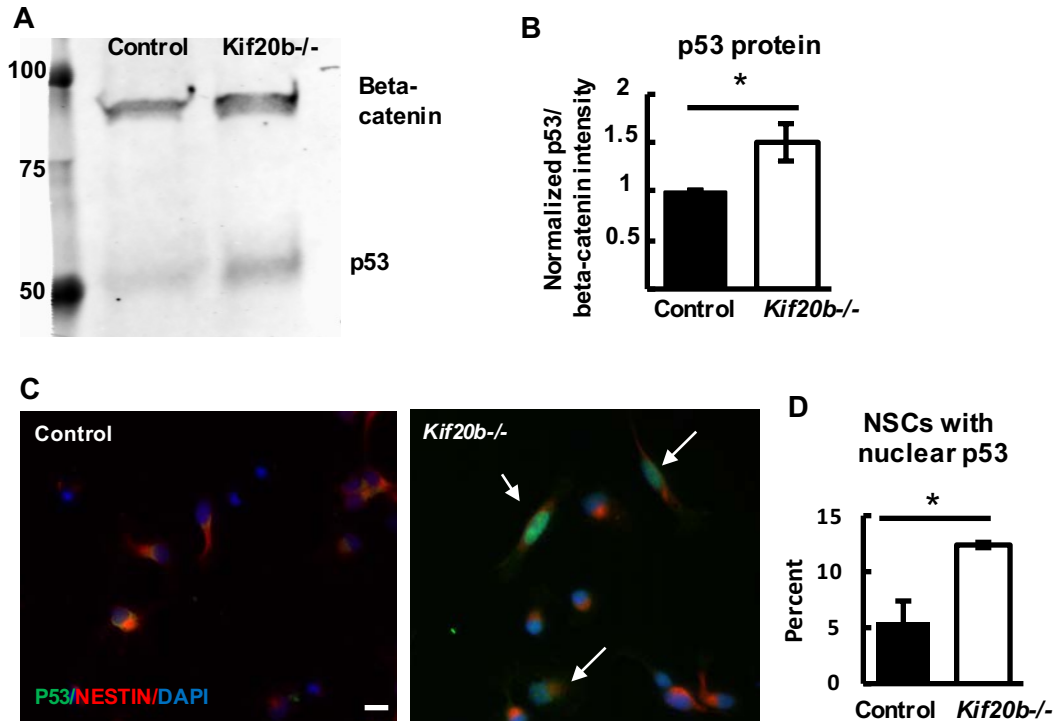

**Supplemental Figure S2. p53 protein level is elevated in *Kif20b*<sup>-/-</sup> E12.5 brain lysates and dissociated NSCs**

**A.** Immunoblot from E12.5 control and *Kif20b*<sup>-/-</sup> cortical lysates shows bands for p53 (53 kDa) and beta-catenin (95 kDa) as a loading control.

**B.** p53 band intensity, normalized to beta-catenin bands, is increased by 50% in *Kif20b*<sup>-/-</sup> samples. n = 4 blots from 4 embryos each. \* p < 0.05, paired ratio t-test.

**C.** Representative images of E12.5 dissociated cortical cultures fixed after 24 hrs *in vitro*, and immunostained for p53 (green) and nestin (red) to mark NSCs. Scale bar: 10 μm.

**D.** The average percent of NSCs with detectable nuclear p53 staining is increased more than two-fold in *Kif20b*<sup>-/-</sup> cultures. n = 3 cultures for each genotype, each from an independent E12.5 brain.

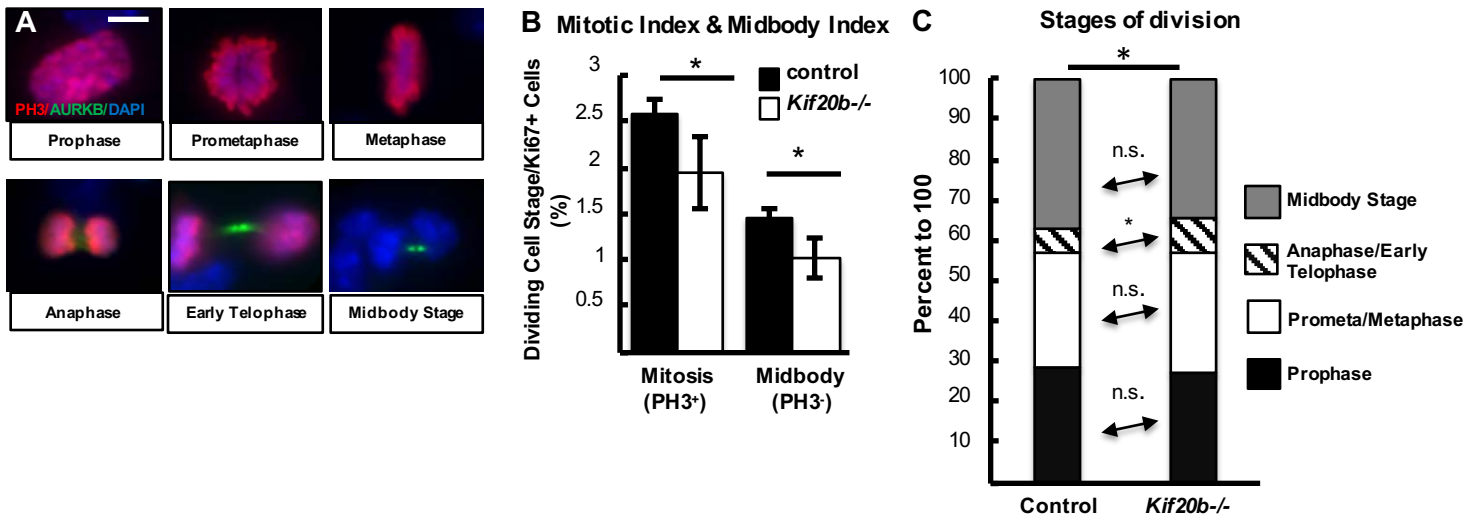

**Supplemental Figure S3. Analyses of mitotic and midbody indices in *Kif20b* mutant NSC cultures**

**A.** Examples of E 12.5 dissociated cortical NSCs at stages of mitosis and cytokinesis, labeled with PH3 (red) and AurkB (green).

**B.** The mean percentages (+/- s.e.m.) of cycling NSCs (Ki67+) in mitosis or midbody stage are slightly reduced in *Kif20b*<sup>-/-</sup> cultures.

**C.** Categorizing the dividing NSCs from B, there is a small increase of *Kif20b*<sup>-/-</sup> NSCs in anaphase/early telophase. For B and C, n = 3 coverslips from 3 embryos each, with 1499 control and 1421 *Kif20b*<sup>-/-</sup> Ki67+ cells. \* p < 0.05, Student's t-test for (B), Chi Square and Fisher's exact test for (C). All cultures dissociated from E 12.5 cortices and fixed after 24 hours. Scale bar, 5 μm.
